# Supplementary material for: Degradation of DNA damage-independently stalled RNA polymerase II is independent of the E3 ligase Elc1
Source: PubMed Central journal article supplement — Nucleic Acids Res. 2014 Aug 12;42(16):10503–15. doi: 10.1093/nar/gku731 (PMC4176355; doi:10.1093/nar/gku731), 2014-08-12
Supplement: supp_gku731_nar-01071-m-2014-File009.pdf [file supp_gku731_nar-01071-m-2014-File009.pdf]

## Degradation of DNA damage-independently stalled RNA polymerase II is independent of the E3 ligase Elc1

Eleni Karakasili, Cornelia Burkert-Kautzsch, Anja Kieser and Katja Sträßer

Gene Center and Munich Center for Integrated Protein Science CIPSM at the Department of Biochemistry of the Ludwig-Maximilians-University of Munich, Feodor-Lynen-Str. 25, 81377 Munich, Germany

degradation of DNA damage-dependently stalled RNAPII

degradation of DNA damage-independently stalled RNAPII

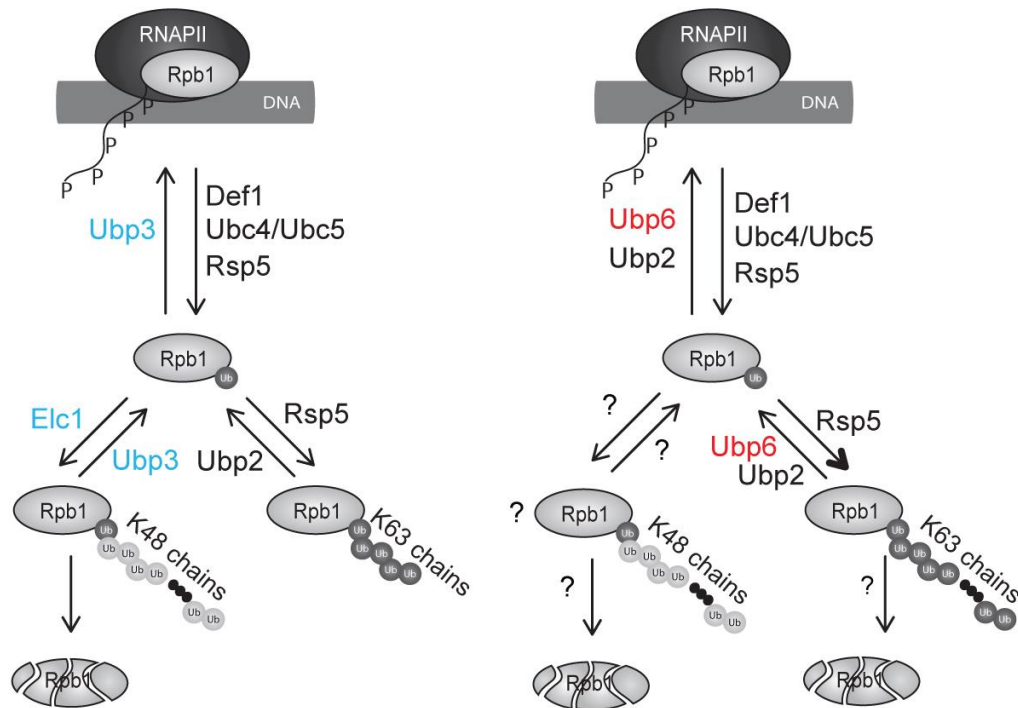

**Figure S1** Models comparing the degradation of Rpb1 of persistently stalled RNAP II complexes due to different causes. The pathway for degradation upon DNA damage is shown on the left side and the pathway for degradation of DNA damage-independently stalled RNAPII is shown on the right side. See text for details.

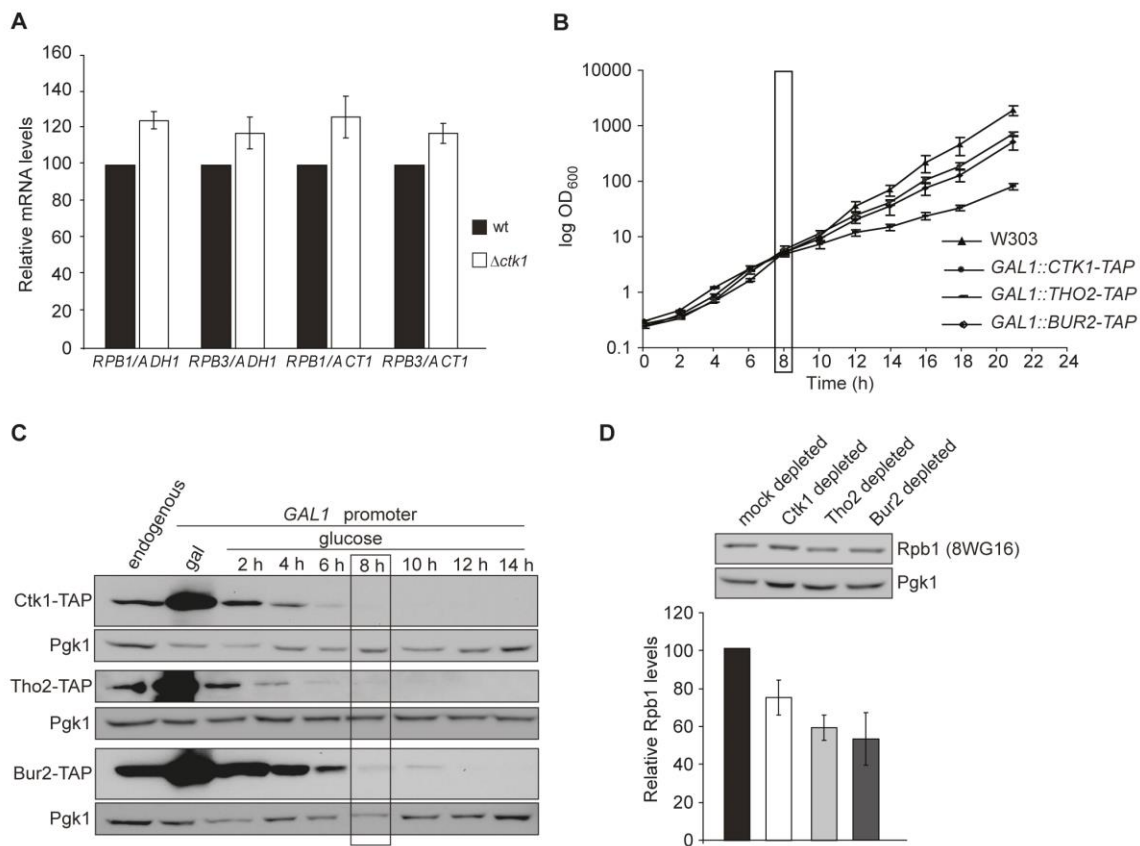

**Figure S2** Depletion of transcription elongation factors causes lower total levels of Rpb1. (A) Levels of mRNAs encoding Rpb1 and Rpb3 are not reduced compared to mRNAs encoding the house-keeping proteins Adh1 and Act1 in  $\Delta ctk1$  cells. To quantify total mRNA levels encoding Rpb1, Rpb3, Adh1 and Act1, RNA was extracted from yeast as previously described by (1). First strand cDNA synthesis was performed using oligo-dT and M-MuLV Reverse Transcriptase (Fermentas). The cDNA was analyzed by Real-Time PCR on an ABI Prism 7000 machine (Applied Biosystems). Reactions were performed as for the ChIP analysis. Relative *RPB1* and *RPB3* mRNA levels were calculated using a standard curve method as the ratio of the *RPB1* and *RPB3* over the *ADH1* or *ACT1* mRNA amount, respectively. Primer sequences are available on request. Columns and error bars represent the mean  $\pm$  standard deviation from 3 independent experiments (bottom panels). (B) Growth curve of yeast cells depleted of Ctk1, Tho2, or Bur2. Growth is not impaired during the first 8 hours of depletion. (C) Protein levels of Ctk1, Tho2, and Bur2 after different depletion times. Depletion of TAP-tagged versions of these proteins was assessed by Western blotting using PAP antibody (Peroxidase Anti-Peroxidase; Sigma). (D) Total levels of Rpb1 were reduced after 8 hours of depletion of Ctk1, Tho2, or Bur2. Columns and error bars represent the mean  $\pm$  standard deviation from 3 independent experiments (bottom panel).

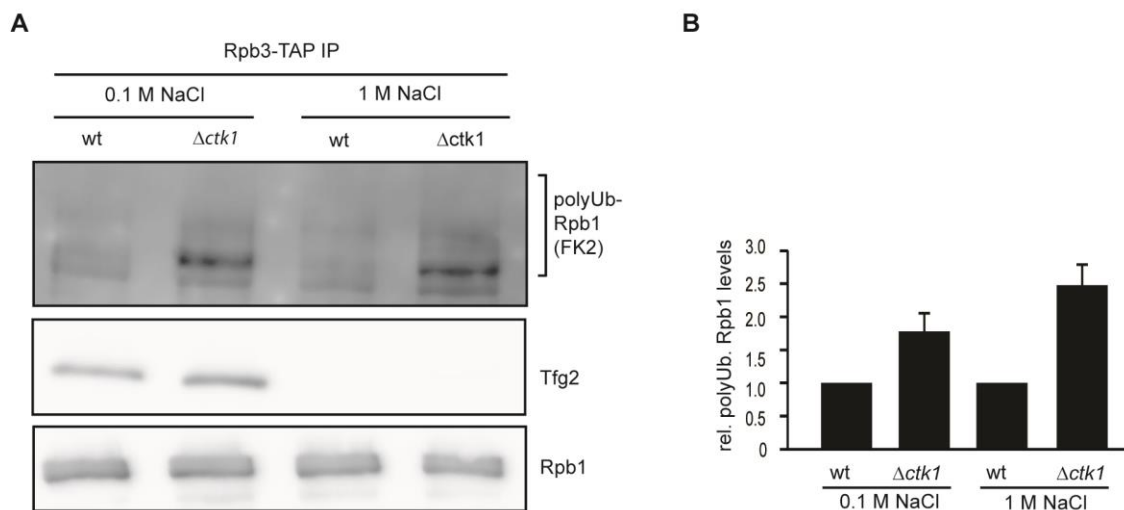

**Figure S3** Ubiquitylation of Rpb1 is increased when transcription elongation is impaired by deletion of *CTK1*. **(A)** Equal amounts of RNAPII were purified from Rpb3 TAP-tagged wt and  $\Delta ctk1$  strains with buffer containing 100 mM or 1 M NaCl (high salt) in the presence of deubiquitylase and proteasome inhibitors by using limiting amounts of beads. Polyubiquitylation of Rpb1 was assessed by Western blotting using a ubiquitin-specific antibody (upper panel) and normalized to the amount of purified Rpb1 (lower panel). Tfg2, a subunit of TFIIF, a transcription factor with the highest affinity for RNAPII, does not copurify with RNAPII under high salt conditions (middle panel). **(B)** Ubiquitylation of Rpb1 increased in the  $\Delta ctk1$  strain compared to wt when RNAPII was purified under high salt conditions. The respective ubiquitin signal was normalized to the amount of Rpb1. Columns and error bars represent the mean  $\pm$  standard deviation of three independent experiments.

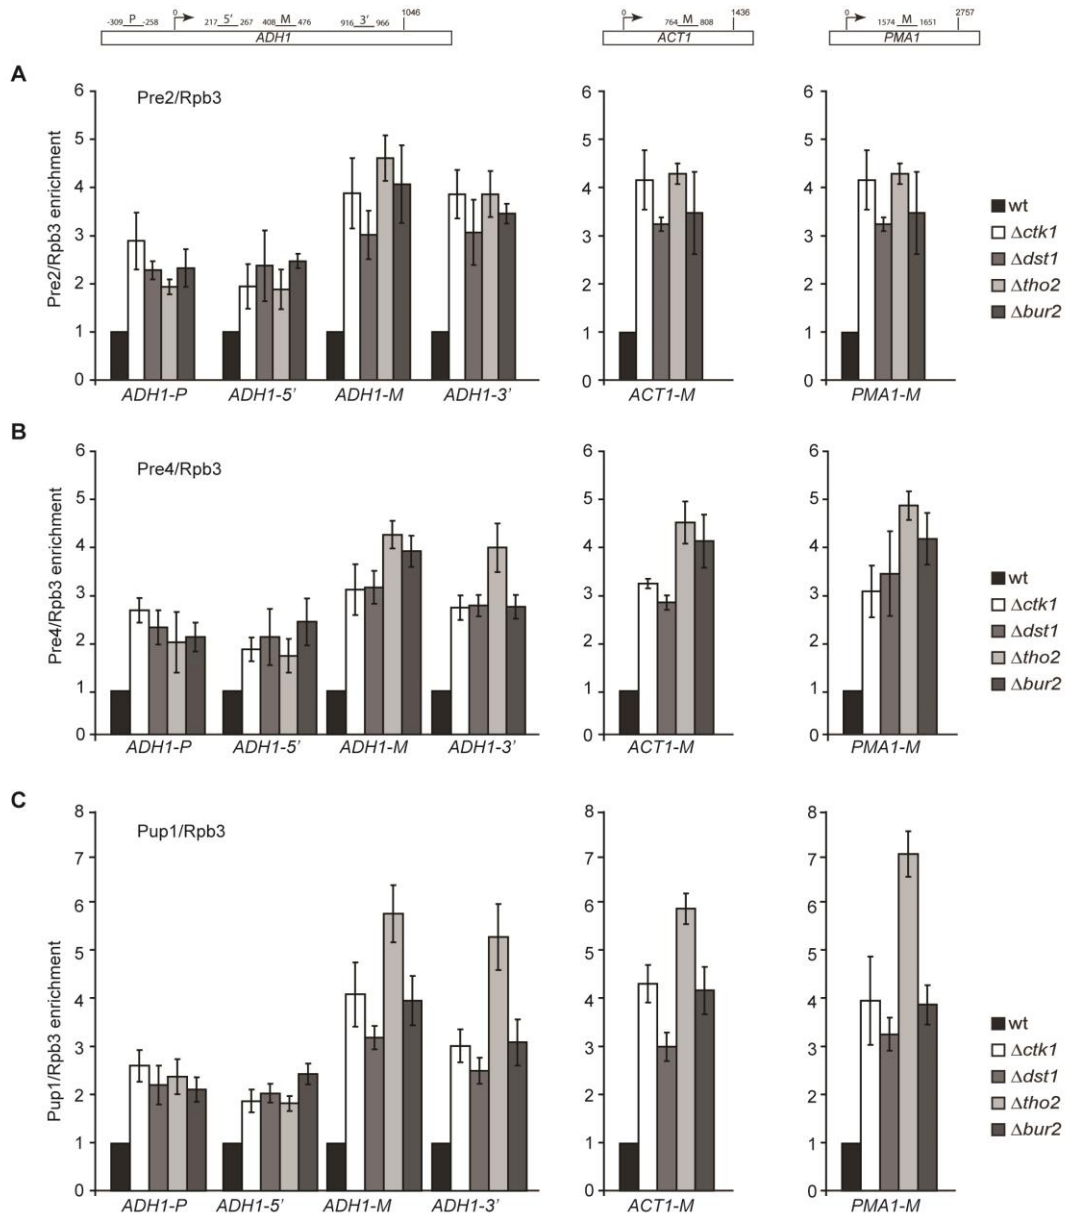

**Figure S4** The proteasome is recruited to actively transcribed genes. ChIP experiments were performed with *PRE2*-, *PRE4*-, and *PUP1-TAP* strains and recruitment to *ADH1*, *ACT1*, and *PMA1* was quantified by RealTime-PCR with the indicated primers (upper panels) and calculated relative to the recruitment of Rpb3. Columns and error bars represent the mean  $\pm$  standard deviation from 3 independent experiments (bottom panels).

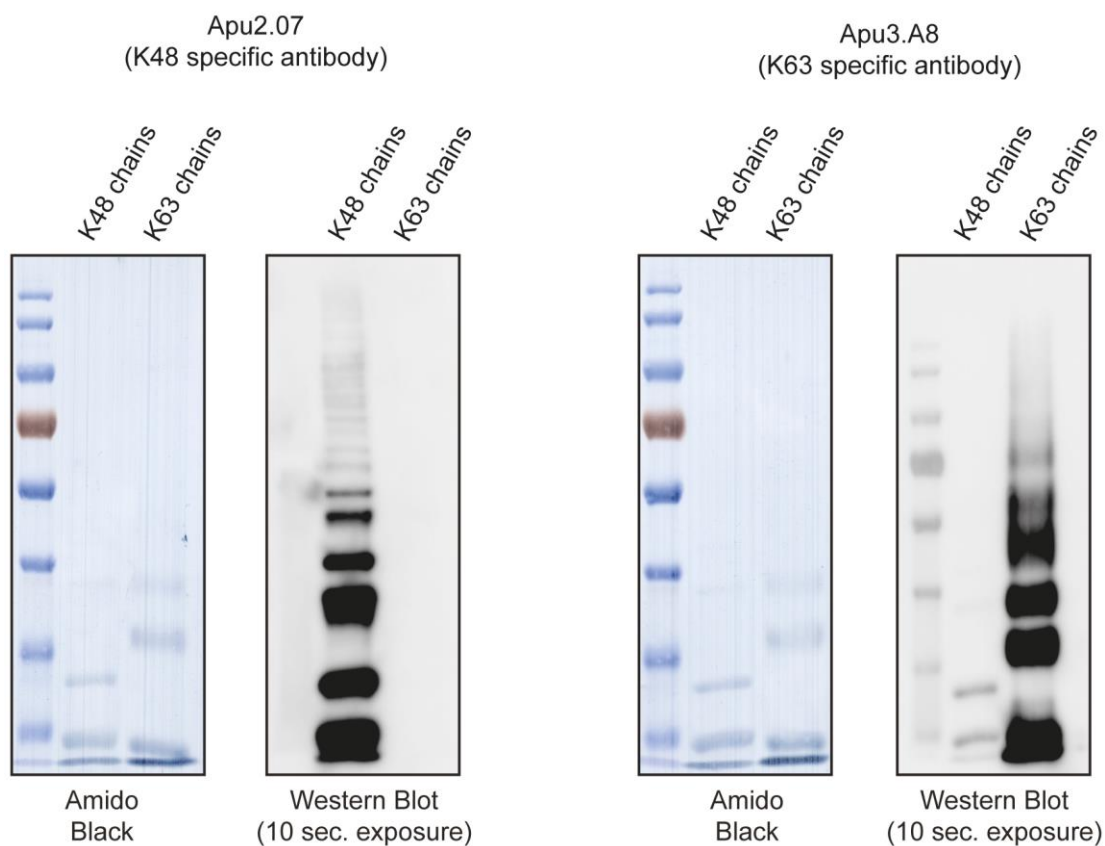

**Figure S5** Specificity and affinity of the linkage-specific antibodies Apu2.07 (K48) and Apu3.A8 (K63). 5  $\mu$ g of K48- or K63-chains (Sigma) were loaded, blotted and detected with the respective antibody. Each antibody is specific for the K48- or K63-linked chain, respectively, and with approximately equal affinity.

**Table S1** Yeast strains

| Name                                | Nr.     | Back-ground | Genotype                                                               | Reference  |
|-------------------------------------|---------|-------------|------------------------------------------------------------------------|------------|
| W303                                | YKS8    |             | <i>ura3-1, trp1-1, his3-11,15, leu2-3,112, ade2-1, can1-100, GAL+</i>  |            |
| <i>CTK1</i> shuffle                 | YKS814  | W303        | <i>ctk1::HIS3</i> , pRS316- <i>CTK1</i>                                | (2)        |
| <i>DST1</i> shuffle                 | YKS1027 | W303        | <i>dst1::HIS3</i> , pRS316- <i>DST1</i>                                | This study |
| <i>THO2</i> shuffle                 | YKS1108 | W303        | <i>tho2::kanMX6</i> , pRS316- <i>THO2</i>                              | This study |
| <i>BUR2</i> shuffle                 | YKS1101 | W303        | <i>bur2::kanMX6</i> , pRS316- <i>BUR2</i>                              | This study |
| BY4741                              | YKS1470 |             | <i>his3Δ, leu2Δ, lys2Δ, met15Δ, trp1Δ::hisG, URA::CMV-tTA</i>          | (3)        |
| <i>rpb1-N488D</i>                   | YKS1614 | BY4741      | <i>rpb1-N488D</i>                                                      | (3)        |
| <i>rpb1-E1103G</i>                  | YKS1615 | BY4741      | <i>rpb1-E1103G</i>                                                     | (3)        |
| <i>RPB3-TAP</i>                     | YKS1138 | W303        | <i>RPB3-TAP::TRP1</i>                                                  | This study |
| <i>RPB3-TAP CTK1</i> shuffle        | YKS981  | W303        | <i>CTK1::HIS3, RPB3-TAP::TRP1</i> , pRS316- <i>CTK1</i>                | This study |
| <i>RPB3-TAP DST1</i> shuffle        | YKS1030 | W303        | <i>dst1::HIS3, RPB3-TAP::TRP1</i> , pRS316- <i>DST1</i>                | This study |
| <i>RPB3-TAP THO2</i> shuffle        | YKS1109 | W303        | <i>tho2::kanMX6, RPB3-TAP::TRP1</i> , pRS316- <i>THO2</i>              | This study |
| <i>RPB3-TAP BUR2</i> shuffle        | YKS1103 | W303        | <i>bur2::kanMX6, RPB3-TAP::TRP1</i> , pRS316- <i>BUR2</i>              | This study |
| <i>RPB3-TAP</i>                     | YKS1613 | BY4741      | <i>RPB3-TAP::TRP1</i>                                                  | This study |
| <i>RPB3-TAP rpb1-N488D</i>          | YKS1614 | BY4741      | <i>rpb1-N488D, RPB3-TAP::TRP1</i>                                      | This study |
| <i>RPB3-TAP rpb1-E1103G</i>         | YKS1615 | BY4741      | <i>rpb1-E1103G, RPB3-TAP::TRP1</i>                                     | This study |
| <i>PRE1-TAP CTK1</i> shuffle        | YKS982  | W303        | <i>ctk1::HIS3, PRE1-TAP::TRP1</i> , pRS316- <i>CTK1</i>                | This study |
| <i>PRE1-TAP DST1</i> shuffle        | YKS1033 | W303        | <i>dst1::HIS3, PRE1-TAP::TRP1</i> , pRS316- <i>DST1</i>                | This study |
| <i>PRE1-TAP THO2</i> shuffle        | YKS1110 | W303        | <i>tho2::kanMX6, PRE1-TAP::TRP1</i> , pRS316- <i>THO2</i>              | This study |
| <i>PRE1-TAP BUR2</i> shuffle        | YKS1104 | W303        | <i>bur2::kanMX6, PRE1-TAP::TRP1</i> , pRS316- <i>BUR2</i>              | This study |
| <i>RPB3-TAP Δubc4</i>               | YKS1649 | W303        | <i>ubc4::HIS3, RPB3-TAP::TRP1</i>                                      | This study |
| <i>RPB3-TAP Δubc4 DST1</i> shuffle  | YKS1650 | W303        | <i>ubc4::HIS3, dst1::HIS3, RPB3-TAP::TRP1</i> , pRS316- <i>DST1</i>    | This study |
| <i>RPB3-TAP Δubc5</i>               | YKS1652 | W303        | <i>ubc5::HIS3, RPB3-TAP::TRP1</i>                                      | This study |
| <i>RPB3-TAP Δubc5 DST1</i> shuffle  | YKS1653 | W303        | <i>ubc5::HIS3, dst1::HIS3, RPB3-TAP::TRP1</i> , pRS316- <i>DST1</i>    | This study |
| <i>RPB3-TAP RSP5</i> shuffle        | YKS1654 | W303        | <i>rsp5::HIS3, RPB3-TAP::TRP1</i>                                      | This study |
| <i>RPB3-TAP Δdst1 RSP5</i> shuffle  | YKS1655 | W303        | <i>rsp5::HIS3, dst1::HIS3, RPB3-TAP::TRP1</i> , pRS316- <i>DST1</i>    | This study |
| <i>RPB3-TAP Δdef1</i>               | YKS1656 | W303        | <i>def1::kanMX6, RPB3-TAP::TRP1</i>                                    | This study |
| <i>RPB3-TAP Δdef1 DST1</i> shuffle  | YKS1657 | W303        | <i>def1::kanMX6, dst1::HIS3, RPB3-TAP::TRP1</i> , pRS316- <i>DST1</i>  | This study |
| <i>RPB3-TAP Δrad26</i>              | YKS1840 | W303        | <i>rad26::kanMX6, RPB3-TAP::TRP1</i>                                   | This study |
| <i>RPB3-TAP Δrad26 DST1</i> shuffle | YKS1841 | W303        | <i>rad26::kanMX6, dst1::HIS3, RPB3-TAP::TRP1</i> , pRS316- <i>DST1</i> | This study |
| <i>RPB3-TAP Δubp3</i>               | YKS1665 | W303        | <i>ubp3::HIS3, RPB3-TAP::TRP1</i>                                      | This study |
| <i>RPB3-TAP Δubp3 DST1</i> shuffle  | YKS1666 | W303        | <i>ubp3::HIS3, dst1::HIS3, RPB3-TAP::TRP1</i> , pRS316- <i>DST1</i>    | This study |
| <i>RPB3-TAP Δubp2</i>               | YKS1746 | W303        | <i>ubp2::kanMX6, RPB3-TAP::TRP1</i>                                    | This study |
| <i>RPB3-TAP Δubp2 DST1</i> shuffle  | YKS1751 | W303        | <i>ubp2::kanMX6, dst1::HIS3, RPB3-TAP::TRP1</i> , pRS316- <i>DST1</i>  | This study |
| <i>RPB3-TAP Δubp6</i>               | YKS1696 | W303        | <i>ubp6::kanMX6, RPB3-TAP::TRP1</i>                                    | This study |
| <i>RPB3-TAP Δubp6 DST1</i> shuffle  | YKS1714 | W303        | <i>ubp6::kanMX6, dst1::HIS3, RPB3-TAP::TRP1</i> , pRS316- <i>DST1</i>  | This study |
| <i>RPB3-TAP Δelc1</i>               | YKS1745 | W303        | <i>elc1::kanMX6, RPB3-TAP::TRP1</i>                                    | This study |
| <i>RPB3-TAP Δelc1 DST1</i> shuffle  | YKS1747 | W303        | <i>elc1::kanMX6, dst1::HIS3, RPB3-TAP::TRP1</i> , pRS316- <i>DST1</i>  | This study |
| <i>GAL1::CTK1-TAP</i>               | YKS552  | RS453       | <i>HIS3::PGAL1::CTK1-TAP::URA3</i>                                     | (2)        |

|                              |         |       |                                                  |            |
|------------------------------|---------|-------|--------------------------------------------------|------------|
| <i>GAL1::THO2-TAP</i>        | YKS1617 | RS453 | <i>HIS3::PGAL1::THO2-TAP::TRP1</i>               | This study |
| <i>GAL1::BUR2-TAP</i>        | YKS1618 | RS453 | <i>HIS3::PGAL1::BUR2-TAP::TRP1</i>               | This study |
| <i>PRE2-TAP CTK1</i> shuffle | YKS1042 | W303  | <i>ctk1::HIS3, PRE2-TAP::TRP1, pRS316-CTK1</i>   | This study |
| <i>PRE4-TAP CTK1</i> shuffle | YKS983  | W303  | <i>ctk1::HIS3, PRE4-TAP::TRP1, pRS316-CTK1</i>   | This study |
| <i>PUP1-TAP CTK1</i> shuffle | YKS1041 | W303  | <i>ctk1::HIS3, PUP1-TAP::TRP1, pRS316-CTK1</i>   | This study |
| <i>PRE2-TAP DST1</i> shuffle | YKS1034 | W303  | <i>dst1::HIS3, PRE2-TAP::TRP1, pRS316-DST1</i>   | This study |
| <i>PRE4-TAP DST1</i> shuffle | YKS1035 | W303  | <i>dst1::HIS3, PRE4-TAP::TRP1, pRS316-DST1</i>   | This study |
| <i>PUP1-TAP DST1</i> shuffle | YKS1031 | W303  | <i>dst1::HIS3, PUP1-TAP::TRP1, pRS316-DST1</i>   | This study |
| <i>PRE2-TAP THO2</i> shuffle | YKS1111 | W303  | <i>THO2::kanMX6, PRE2-TAP::TRP1, pRS316-THO2</i> | This study |
| <i>PRE4-TAP THO2</i> shuffle | YKS1112 | W303  | <i>THO2::kanMX6, PRE4-TAP::TRP1, pRS316-THO2</i> | This study |
| <i>PUP1-TAP THO2</i> shuffle | YKS1113 | W303  | <i>THO2::kanMX6, PUP1-TAP::TRP1, pRS316-THO2</i> | This study |
| <i>PRE2-TAP BUR2</i> shuffle | YKS1105 | W303  | <i>BUR2::kanMX6, PRE2-TAP::TRP1, pRS316-BUR2</i> | This study |
| <i>PRE4-TAP BUR2</i> shuffle | YKS1106 | W303  | <i>BUR2::kanMX6, PRE4-TAP::TRP1, pRS316-BUR2</i> | This study |
| <i>PUP1-TAP BUR2</i> shuffle | YKS1107 | W303  | <i>BUR2::kanMX6, PUP1-TAP::TRP1, pRS316-BUR2</i> | This study |

**Table S2** Plasmids

| <i>Name</i>                         | <i>Plasmid Nr.</i> | <i>Reference</i> |
|-------------------------------------|--------------------|------------------|
| pRS314                              | pKS6               | (4)              |
| pRS315                              | pKS7               | (4)              |
| pRS316                              | pKS8               | (4)              |
| pRS315- <i>CTK1</i>                 | pKS391             | (5)              |
| pRS316- <i>CTK1</i>                 | pKS491             | (2)              |
| pRS315- <i>DST1</i>                 | pKS621             | This study       |
| pRS316- <i>DST1</i>                 | pKS622             | This study       |
| pRS315- <i>THO2</i>                 | pKS181             | A. Aguilera      |
| pRS316- <i>THO2</i>                 | pKS520             | This study       |
| pRS315- <i>BUR2</i>                 | pKS395             | This study       |
| pRS316- <i>BUR2</i>                 | pKS431             | This study       |
| pRS316- <i>UBC4</i>                 | pKS1311            | This study       |
| pRS316- <i>UBC5</i>                 | pKS1314            | This study       |
| pRS316- <i>DEF1</i>                 | pKS1305            | This study       |
| pRS315- <i>RSP5</i>                 | pKS1316            | This study       |
| pRS316- <i>RSP5</i>                 | pKS1317            | This study       |
| pHJ80                               | pKS1569            | (6)              |
| pHJ81                               | pKS1570            | (6)              |
| pBSIIKS+5'- <i>tho2-kanMX6</i> -3'  | pKS1352            | This study       |
| pBSIIKS+5'- <i>bur2-kanMX4</i> -3'  | pKS 348            | This study       |
| pBSIIKS+5'- <i>ubc4-HIS3</i> -3'    | pKS1324            | This study       |
| pBSIIKS+5'- <i>ubc5-HIS3</i> -3'    | pKS1326            | This study       |
| pBSIIKS+5'- <i>def1-kanMX4</i> -3'  | pKS1302            | This study       |
| pBSIIKS+5'- <i>rad26-kanMX4</i> -3' | pKS1569            | This study       |
| pBSIIKS+5'- <i>rsp5-HIS3</i> -3'    | pKS1328            | This study       |
| pBSIIKS+5'- <i>elc1-kanMX6</i> -3'  | pKS1552            | This study       |
| pBSIIKS+5'- <i>ubp2-kanMX6</i> -3'  | pKS1554            | This study       |
| pBSIIKS+5'- <i>ubp3-kanMX6</i> -3'  | pKS1376            | This study       |
| pBSIIKS+5'- <i>ubp6-kanMX6</i> -3'  | pKS1559            | This study       |

**Table S3 p-values**

|                       |    |                           | <b>p-value</b> |
|-----------------------|----|---------------------------|----------------|
| <b>Figure 1A</b>      |    |                           |                |
| wt                    | to | <i>Δctk1</i>              | < 0.0001       |
| wt                    | to | <i>Δdst1</i>              | 0.0011         |
| wt                    | to | <i>Δtho2</i>              | 0.0067         |
| wt                    | to | <i>Δbur2</i>              | < 0.0001       |
| wt + solvent          | to | wt + 6AU                  | 0.0006         |
| <b>Figure 2A</b>      |    |                           |                |
| wt                    | to | <i>Δctk1</i>              | < 0.0001       |
| wt                    | to | <i>Δdst1</i>              | < 0.0001       |
| wt                    | to | <i>Δtho2</i>              | < 0.0001       |
| wt                    | to | <i>Δbur2</i>              | 0.0028         |
| <b>Figure 3A</b>      |    |                           |                |
| wt                    | to | mock                      | 0.0003         |
| wt                    | to | <i>Δctk1</i>              | 0.0047         |
| wt                    | to | <i>Δdst1</i>              | 0.0162         |
| wt                    | to | <i>Δtho2</i>              | 0.0023         |
| wt                    | to | <i>Δbur2</i>              | 0.0026         |
| <b>Figure 3D</b>      |    |                           |                |
| <u><i>ADHI P</i></u>  |    |                           |                |
| Pre1 vs Rpb3 wt       | to | Pre1 vs Rpb3 <i>Δctk1</i> | 0.0023         |
| Pre1 vs Rpb3 wt       | to | Pre1 vs Rpb3 <i>Δdst1</i> | 0.0356         |
| Pre1 vs Rpb3 wt       | to | Pre1 vs Rpb3 <i>Δtho2</i> | < 0.0001       |
| Pre1 vs Rpb3 wt       | to | Pre1 vs Rpb3 <i>Δbur2</i> | 0.0007         |
| <u><i>ADHI 5'</i></u> |    |                           |                |
| Pre1 vs Rpb3 wt       | to | Pre1 vs Rpb3 <i>Δctk1</i> | 0.0689         |
| Pre1 vs Rpb3 wt       | to | Pre1 vs Rpb3 <i>Δdst1</i> | 0.0463         |
| Pre1 vs Rpb3 wt       | to | Pre1 vs Rpb3 <i>Δtho2</i> | 0.0005         |
| Pre1 vs Rpb3 wt       | to | Pre1 vs Rpb3 <i>Δbur2</i> | < 0.0001       |
| <u><i>ADHI M</i></u>  |    |                           |                |
| Pre1 vs Rpb3 wt       | to | Pre1 vs Rpb3 <i>Δctk1</i> | 0.0004         |
| Pre1 vs Rpb3 wt       | to | Pre1 vs Rpb3 <i>Δdst1</i> | 0.0063         |
| Pre1 vs Rpb3 wt       | to | Pre1 vs Rpb3 <i>Δtho2</i> | 0.0020         |
| Pre1 vs Rpb3 wt       | to | Pre1 vs Rpb3 <i>Δbur2</i> | 0.0005         |
| <u><i>ADHI 3'</i></u> |    |                           |                |
| Pre1 vs Rpb3 wt       | to | Pre1 vs Rpb3 <i>Δctk1</i> | 0.0016         |
| Pre1 vs Rpb3 wt       | to | Pre1 vs Rpb3 <i>Δdst1</i> | 0.0020         |
| Pre1 vs Rpb3 wt       | to | Pre1 vs Rpb3 <i>Δtho2</i> | 0.0007         |
| Pre1 vs Rpb3 wt       | to | Pre1 vs Rpb3 <i>Δbur2</i> | 0.0009         |
| <u><i>ACT1 M</i></u>  |    |                           |                |
| Pre1 vs Rpb3 wt       | to | Pre1 vs Rpb3 <i>Δctk1</i> | 0.0037         |
| Pre1 vs Rpb3 wt       | to | Pre1 vs Rpb3 <i>Δdst1</i> | 0.0021         |
| Pre1 vs Rpb3 wt       | to | Pre1 vs Rpb3 <i>Δtho2</i> | 0.0111         |
| Pre1 vs Rpb3 wt       | to | Pre1 vs Rpb3 <i>Δbur2</i> | 0.0027         |
| <u><i>PMA1 M</i></u>  |    |                           |                |
| Pre1 vs Rpb3 wt       | to | Pre1 vs Rpb3 <i>Δctk1</i> | 0.0001         |
| Pre1 vs Rpb3 wt       | to | Pre1 vs Rpb3 <i>Δdst1</i> | 0.0011         |
| Pre1 vs Rpb3 wt       | to | Pre1 vs Rpb3 <i>Δtho2</i> | 0.0030         |
| Pre1 vs Rpb3 wt       | to | Pre1 vs Rpb3 <i>Δbur2</i> | < 0.0001       |



| <b>Figure 3G</b>               |    |                                |          |
|--------------------------------|----|--------------------------------|----------|
| <u>Pre1/Rpb3</u>               |    |                                |          |
| <i>ADHI-P</i> solvent          | to | 6-AU                           | 0.1128   |
| <i>ADHI-5'</i> solvent         | to | 6-AU                           | 0.0537   |
| <i>ADHI-M</i> solvent          | to | 6-AU                           | 0.0005   |
| <i>ADHI-3'</i> solvent         | to | 6-AU                           | 0.0370   |
| <b>Figure 4A</b>               |    |                                |          |
| wt                             | to | $\Delta dst1$                  | 0.0092   |
| wt                             | to | $\Delta def1$                  | < 0.0001 |
| wt                             | to | $\Delta dst1 \Delta def1$      | 0.9041   |
| $\Delta dst1$                  | to | $\Delta dst1 \Delta def1$      | 0.0002   |
| <b>Figure 4B</b>               |    |                                |          |
| wt                             | to | $\Delta dst1$                  | < 0.0001 |
| wt                             | to | $\Delta ubc4$                  | 0.0729   |
| wt                             | to | $\Delta ubc5$                  | 0.2298   |
| wt                             | to | $\Delta dst1 \Delta ubc4$      | 0.0030   |
| wt                             | to | $\Delta dst1 \Delta ubc5$      | 0.0064   |
| $\Delta dst1$                  | to | $\Delta dst1 \Delta ubc4$      | 0.0027   |
| $\Delta dst1$                  | to | $\Delta dst1 \Delta ubc5$      | 0.0017   |
| <b>Figure 4C</b>               |    |                                |          |
| wt                             | to | $\Delta dst1$                  | 0.0023   |
| wt                             | to | $\Delta rsp5$                  | 0.1668   |
| wt                             | to | $\Delta dst1 \Delta rsp5$      | 0.0106   |
| $\Delta dst1$                  | to | $\Delta dst1 \Delta rsp5$      | 0.0030   |
| <b>Figure 4D</b>               |    |                                |          |
| wt - UV                        | to | wt + UV                        | 0.0009   |
| wt - UV                        | to | $\Delta dst1$ - UV             | 0.0064   |
| wt - UV                        | to | $\Delta dst1$ + UV             | 0.0327   |
| wt - UV                        | to | $\Delta elc1$ - UV             | 0.9033   |
| wt - UV                        | to | $\Delta elc1$ + UV             | 0.2059   |
| wt - UV                        | to | $\Delta elc1 \Delta dst1$ - UV | 0.0373   |
| wt - UV                        | to | $\Delta elc1 \Delta dst1$ + UV | 0.6204   |
| $\Delta dst1$ - UV             | to | $\Delta dst1$ + UV             | 0.2207   |
| $\Delta dst1$ - UV             | to | $\Delta elc1 \Delta dst1$ - UV | 0.5487   |
| $\Delta dst1$ + UV             | to | $\Delta elc1 \Delta dst1$ + UV | 0.1216   |
| $\Delta elc1$ - UV             | to | $\Delta elc1$ + UV             | 0.6594   |
| $\Delta elc1 \Delta dst1$ - UV | to | $\Delta elc1 \Delta dst1$ + UV | 0.5461   |
| wt - UV                        | to | wt + UV                        | 0.0009   |
| wt - UV                        | to | $\Delta dst1$ - UV             | 0.0064   |
| wt - UV                        | to | $\Delta dst1$ + UV             | 0.0327   |
| wt - UV                        | to | $\Delta elc1$ - UV             | 0.9033   |
| <b>Figure 4E</b>               |    |                                |          |
| wt                             | to | $\Delta dst1$                  | < 0.0001 |
| wt                             | to | $\Delta cul3$                  | < 0.0001 |
| wt                             | to | $\Delta dst1 \Delta cul3$      | 0.0026   |
| $\Delta dst1$                  | to | $\Delta dst1 \Delta cul3$      | 0.0041   |
| <b>Figure 5</b>                |    |                                |          |
| <u>K63-linked chains</u>       |    |                                |          |
| wt                             | to | $\Delta ctk1$                  | 0.0002   |
| wt                             | to | $\Delta dst1$                  | 0.0502   |
| wt                             | to | $\Delta tho2$                  | 0.0076   |
| wt                             | to | $\Delta bur2$                  | 0.0231   |
| <u>K48-linked chains</u>       |    |                                |          |
| wt                             | to | $\Delta ctk1$                  | 0.0011   |

|    |    |              |        |
|----|----|--------------|--------|
| wt | to | <i>Δdst1</i> | 0.9443 |
| wt | to | <i>Δtho2</i> | 0.0445 |
| wt | to | <i>Δbur2</i> | 0.0238 |

#### Figure 6A

|              |    |                    |          |
|--------------|----|--------------------|----------|
| wt           | to | <i>Δdst1</i>       | < 0.0001 |
| wt           | to | <i>Δubp6</i>       | 0.0008   |
| wt           | to | <i>Δdst1 Δubp6</i> | < 0.0001 |
| wt           | to | <i>Δubp3</i>       | 0.0028   |
| wt           | to | <i>Δdst1 Δubp3</i> | 0.0593   |
| wt           | to | <i>Δubp2</i>       | 0.1105   |
| wt           | to | <i>Δdst1 Δubp2</i> | 0.0024   |
| <i>Δdst1</i> | to | <i>Δdst1 Δubp6</i> | < 0.0001 |
| <i>Δdst1</i> | to | <i>Δdst1 Δubp3</i> | 0.0010   |
| <i>Δdst1</i> | to | <i>Δdst1 Δubp2</i> | 0.0032   |

#### Figure 6B

|              |    |                         |          |
|--------------|----|-------------------------|----------|
| wt           | to | <i>Δdst1</i>            | < 0.0001 |
| wt           | to | <i>Δubp6</i>            | 0.0740   |
| wt           | to | <i>ubp6-C118A</i>       | 0.6516   |
| wt           | to | <i>Δdst1 Δubp6</i>      | < 0.0001 |
| wt           | to | <i>Δdst1 ubp6-C118A</i> | < 0.0001 |
| <i>Δdst1</i> | to | <i>Δdst1 Δubp6</i>      | < 0.0001 |
| <i>Δdst1</i> | to | <i>Δdst1 ubp6-C118A</i> | 0.0022   |

## SUPPLEMENTARY REFERENCES

1. Kohrer, K. and Domdey, H. (1991) Preparation of high molecular weight RNA. *Methods Enzymol*, **194**, 398-405.
2. Rother, S. and Strasser, K. (2007) The RNA polymerase II CTD kinase Ctk1 functions in translation elongation. *Genes Dev*, **21**, 1409-1421.
3. Malagon, F., Kireeva, M.L., Shafer, B.K., Lubkowska, L., Kashlev, M. and Strathern, J.N. (2006) Mutations in the *Saccharomyces cerevisiae* RPB1 gene conferring hypersensitivity to 6-azauracil. *Genetics*, **172**, 2201-2209.
4. Sikorski, R.S. and Hieter, P. (1989) A system of shuttle vectors and yeast host strains designed for efficient manipulation of DNA in *Saccharomyces cerevisiae*. *Genetics*, **122**, 19-27.
5. Hurt, E., Luo, M.J., Rother, S., Reed, R. and Strasser, K. (2004) Cotranscriptional recruitment of the serine-arginine-rich (SR)-like proteins Gbp2 and Hrb1 to nascent mRNA via the TREX complex. *Proc Natl Acad Sci U S A*, **101**, 1858-1862.
6. Hanna, J., Hathaway, N.A., Tone, Y., Crosas, B., Elsasser, S., Kirkpatrick, D.S., Leggett, D.S., Gygi, S.P., King, R.W. and Finley, D. (2006) Deubiquitinating enzyme Ubp6 functions noncatalytically to delay proteasomal degradation. *Cell*, **127**, 99-111.
